# Supplementary material for: Organic–inorganic hybrids assembled by bis(undecatungstophosphate) lanthanates and dinuclear copper(ii)–oxalate complexes
Source: Royal Society of Chemistry journal article supplement (doi:10.1039/b713275a), 2007-12-13
Supplement: b713275a.pdf [file b713275a.pdf]

# Supporting Information

## Organic-Inorganic Hybrids Assembled by Bis(undecatungstophosphate) Lanthanates and Dinuclear Copper(II)–Oxalate Complexes

Jianfang Cao, Shuxia Liu,\* Ruige Cao, Linhua Xie,  
Yuanhang Ren, Chaoying Gao and Lin Xu\*

Key Laboratory of Polyoxometalates Science of Ministry of Education, College of Chemistry,  
Northeast Normal University, Changchun City, JiLin, P. R. China 130024.

liusx@nenu.edu.cn, linxu@nenu.edu.cn. Fax: +86-431-85099328.

**Figure S1.** ORTEP view of compound **1**.

**Figure S2.** The coordination environment of La in compound **1**.

**Figure S3.** Schematic illustration of the 3D  $\pi$ – $\pi$  stacking framework of compound **1**.

**Figure S4.** IR spectra of compounds **1-6**.

**Figure S5.** TG curve of compound **1**.

**Figure S6.** XRPD patterns of compounds **1-3**.

**Table S1-6.** Selected bond lengths (Å) and angles (°) in compounds **1-6**.

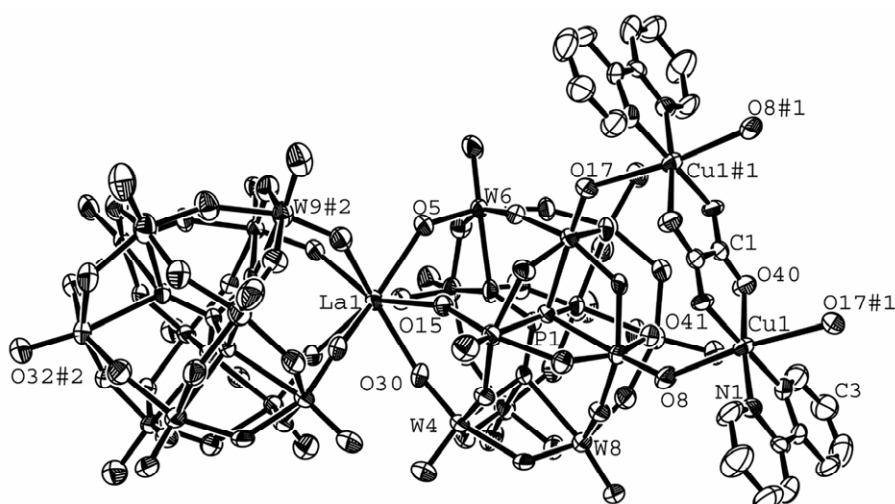

**Figure S1.** ORTEP view of compound **1** with thermal ellipsoids at 50% probability; all the potassium cations, lattice water molecules and hydrogen atoms are omitted for clarity. Symmetry transformations used to generate equivalent atoms: #1 1-x, 1-y, -z; #2 1-x, y, 0.5-z.

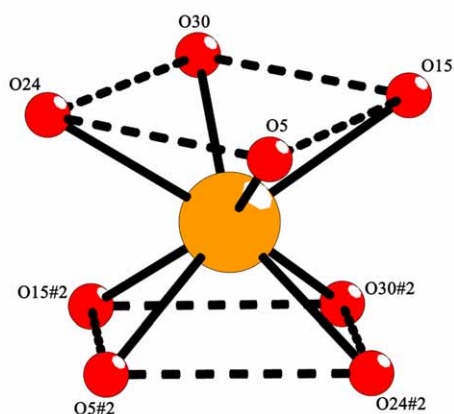

**Figure S2.** The coordination environment of La in compound **1**. Color codes: La, orange; O, red. Symmetry transformation used to generate equivalent atoms, which is similar to Figure S1.

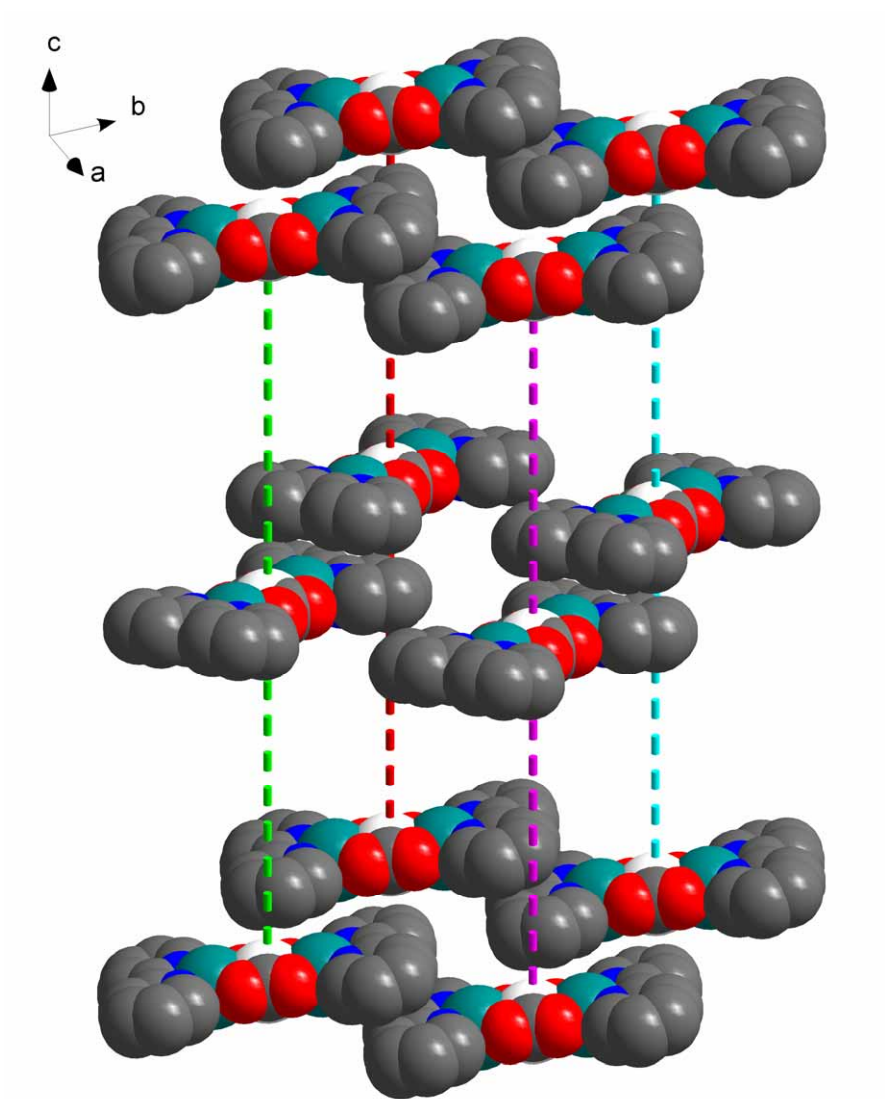

**Figure S3.** Schematic illustration of the 3D  $\pi$ - $\pi$  stacking framework of compound **1**. Color codes: Cu, teal; O, red; N, blue; C, black; fictive atom, white.

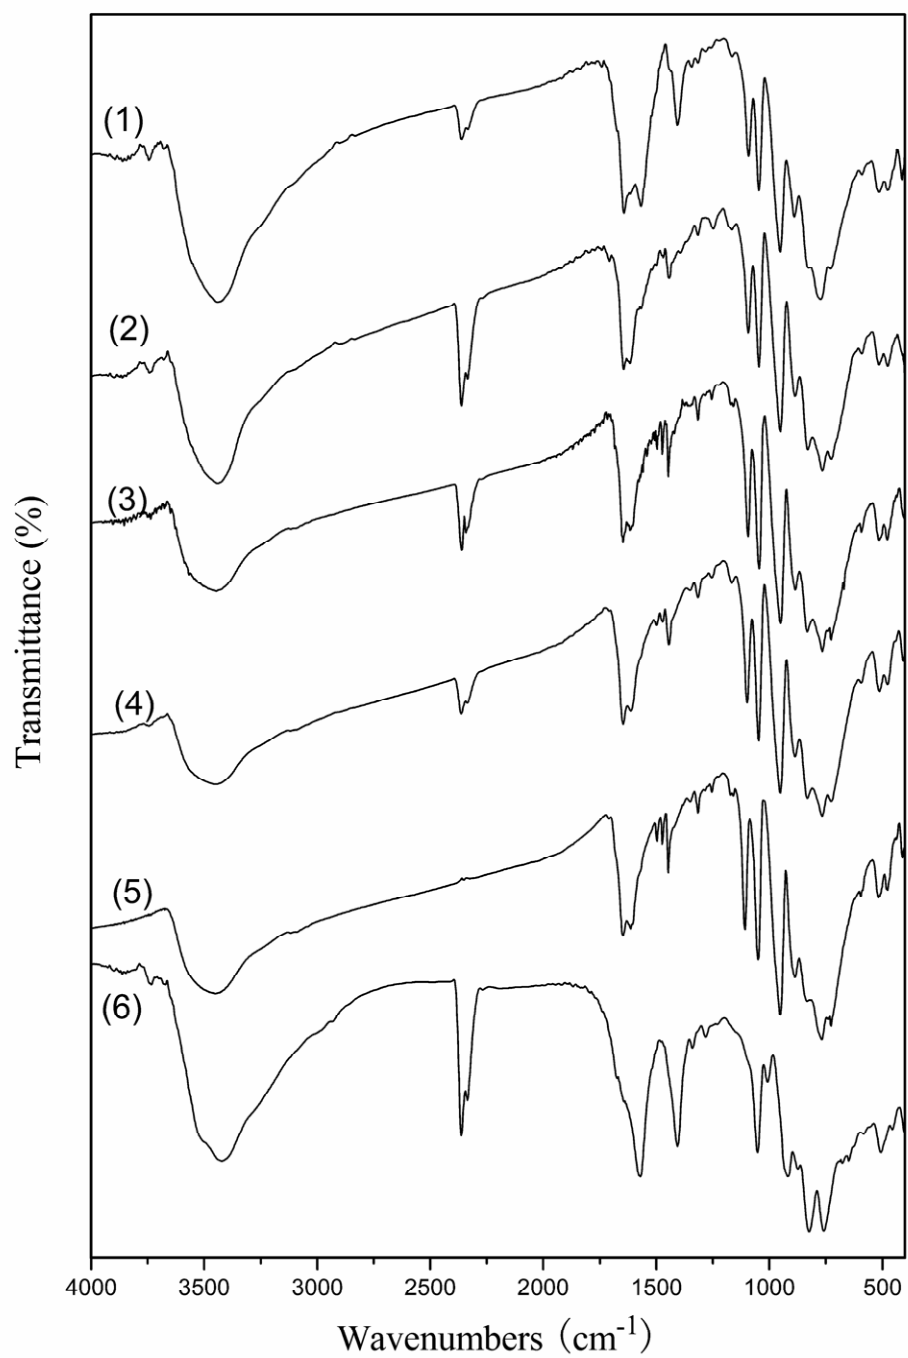

**Figure S4.** IR spectra of compounds **1-6**.

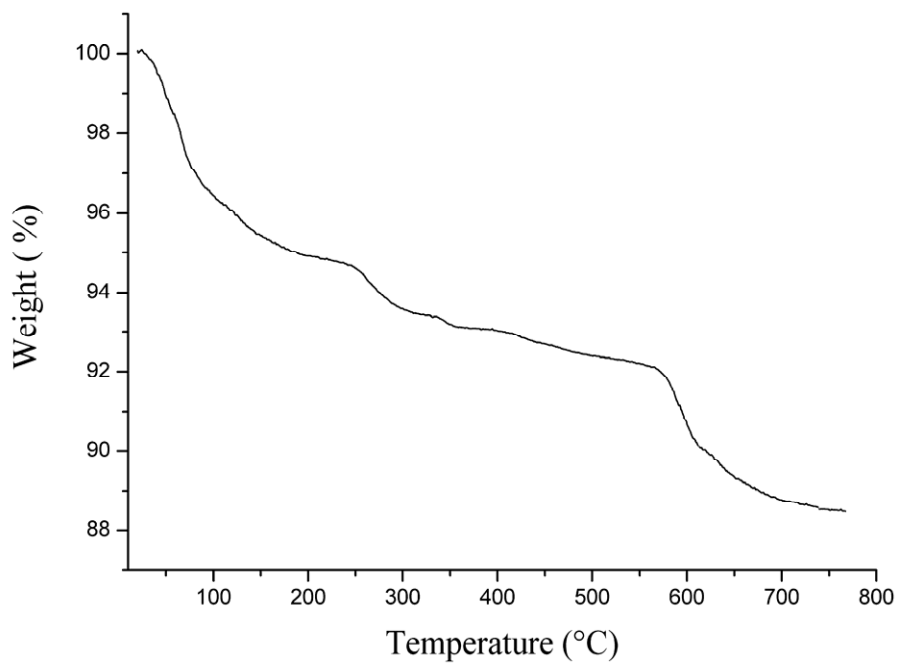

**Figure S5.** TG curve of compound **1**. Heating rate: 10 deg min<sup>-1</sup>, N<sub>2</sub> atmosphere.

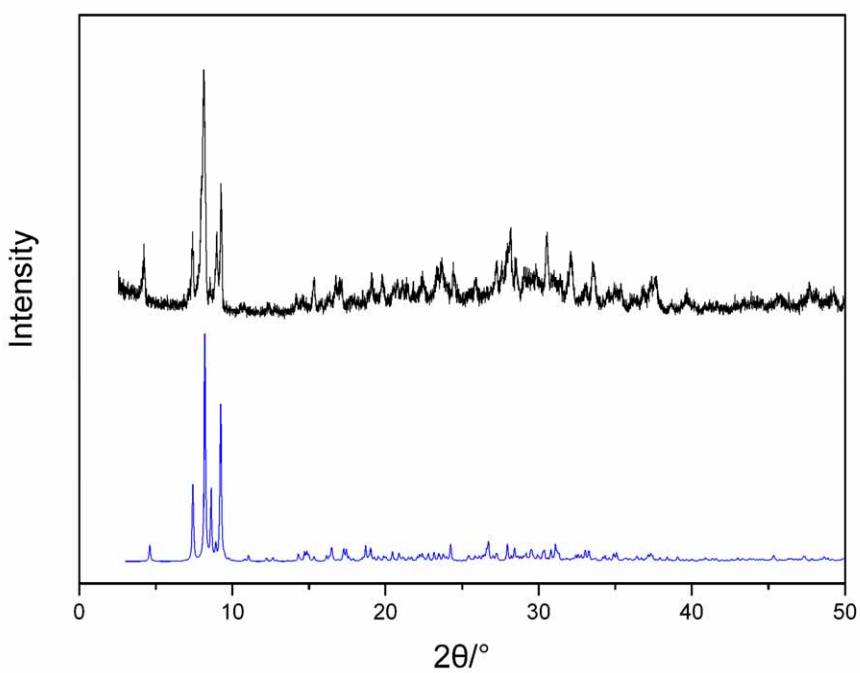

**Figure S6 (a).** XRPD patterns for simulated (blue) and as-synthesized (black) samples of **1**.

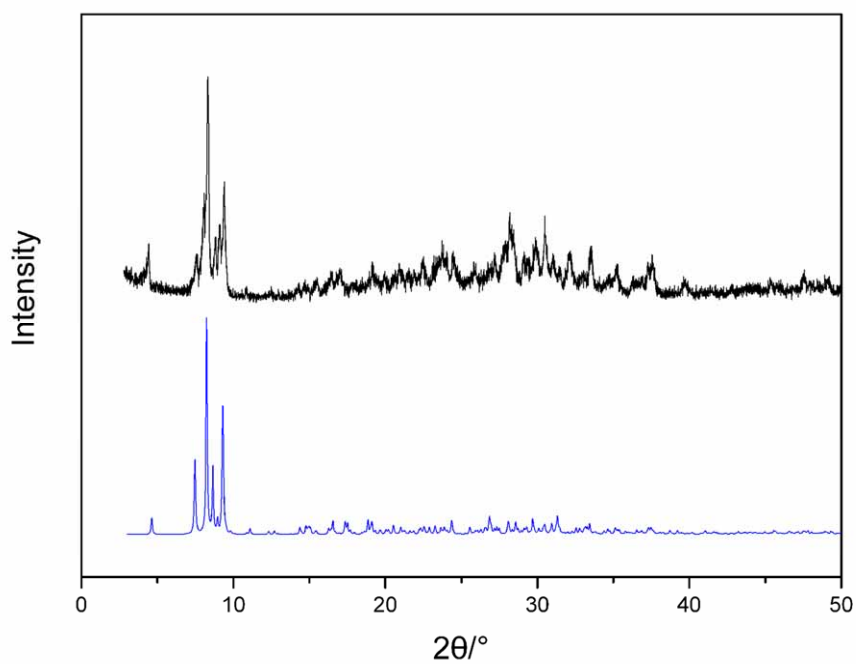

**Figure S6 (b).** XRPD patterns for simulated (blue) and as-synthesized (black) samples of **2**.

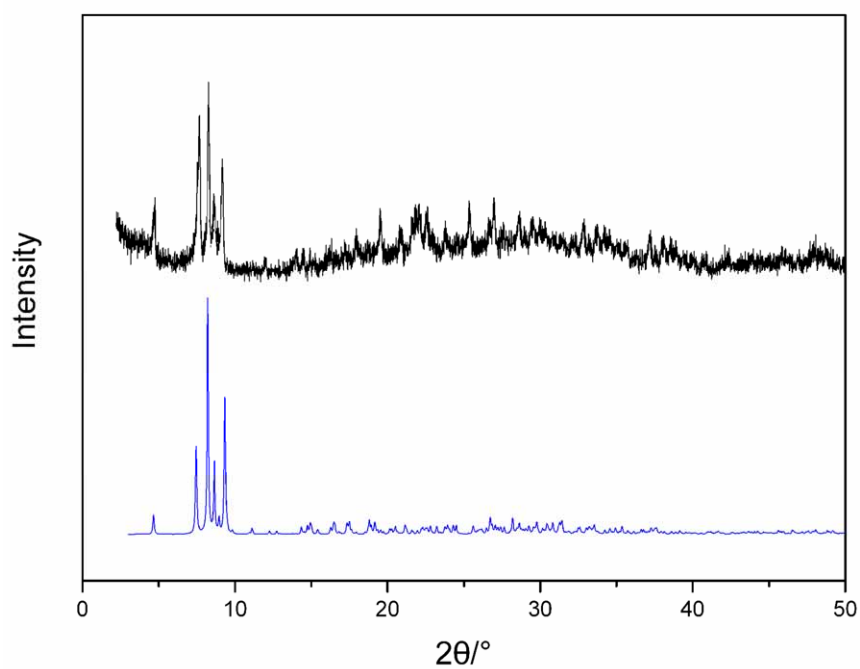

**Figure S6 (c).** XRPD patterns for simulated (blue) and as-synthesized (black) samples of **3**.

**Table S1.** Selected bond lengths (Å) and angles (°) in compound **1<sup>a</sup>**.

|                     |          |                     |          |
|---------------------|----------|---------------------|----------|
| P(1)-O(2)           | 1.527(6) | P(1)-O(3)           | 1.532(7) |
| P(1)-O(11)          | 1.537(7) | P(1)-O(6)           | 1.547(6) |
| W(1)-O(28)          | 1.723(7) | W(1)-O(3)           | 2.457(7) |
| W(2)-O(35)          | 1.702(8) | W(2)-O(6)           | 2.440(7) |
| W(3)-O(8)           | 1.713(7) | W(3)-O(3)           | 2.511(6) |
| W(4)-O(38)          | 1.734(6) | W(4)-O(11)          | 2.465(6) |
| W(5)-O(17)          | 1.702(7) | W(5)-O(3)           | 2.399(6) |
| W(6)-O(29)          | 1.722(7) | W(6)-O(2)           | 2.367(7) |
| W(7)-O(23)          | 1.686(7) | W(7)-O(6)           | 2.439(6) |
| W(8)-O(26)          | 1.702(7) | W(8)-O(11)          | 2.507(6) |
| W(9)-O(34)          | 1.726(8) | W(9)-O(2)           | 2.374(7) |
| W(10)-O(32)         | 1.712(7) | W(10)-O(6)          | 2.423(6) |
| W(11)-O(33)         | 1.711(8) | W(11)-O(11)         | 2.413(7) |
| La(1)-O(30)         | 2.467(7) | La(1)-O(15)         | 2.472(6) |
| La(1)-O(24)         | 2.507(7) | La(1)-O(5)          | 2.513(6) |
| Cu(1)-N(2)          | 1.935(9) | Cu(1)-N(1)          | 1.973(8) |
| Cu(1)-O(40)         | 1.989(6) | Cu(1)-O(41)         | 1.996(6) |
| Cu(1)-O(8)          | 2.378(7) | Cu(1)-O(17)         | 2.548(7) |
| O(2)-P(1)-O(3)      | 88.4(3)  | O(2)-P(1)-O(11)     | 111.0(4) |
| O(3)-P(1)-O(11)     | 101.8(4) | O(2)-P(1)-O(6)      | 110.1(4) |
| O(3)-P(1)-O(6)      | 71.0(3)  | O(28)-W(1)-O(15)    | 103.7(3) |
| O(28)-W(1)-O(10)    | 90.0(3)  | O(28)-W(1)-O(3)     | 164.9(3) |
| O(10)-W(1)-O(18)    | 72.2(2)  | O(10)-W(1)-O(3)     | 71.2(2)  |
| O(19)-W(2)-O(25)    | 105.4(3) | O(35)-W(2)-O(25)    | 101.5(4) |
| O(27)-W(2)-O(6)     | 109.2(4) | O(25)-W(2)-O(36)    | 156.9(3) |
| O(8)-W(3)-O(18)     | 107.7(4) | O(14)-W(3)-O(7)     | 157.4(3) |
| O(18)-W(3)-O(14)    | 103.6(3) | O(14)-W(3)-O(13)    | 84.9(3)  |
| O(38)-W(4)-O(30)    | 82.0(3)  | O(38)-W(4)-O(11)    | 163.8(3) |
| O(39)-W(4)-O(16)    | 80.6(3)  | O(16)-W(4)-O(11)    | 69.8(2)  |
| O(17)-W(5)-O(21)    | 102.9(3) | O(21)-W(5)-O(9)     | 86.8(3)  |
| O(9)-W(5)-O(10)     | 89.5(3)  | O(17)-W(5)-O(3)     | 170.3(3) |
| O(29)-W(6)-O(5)     | 101.4(3) | O(29)-W(6)-O(2)     | 171.9(3) |
| O(5)-W(6)-O(1)      | 163.5(3) | O(31)-W(6)-O(1)     | 84.3(3)  |
| N(2)-Cu(1)-N(1)     | 82.0(4)  | N(2)-Cu(1)-O(41)    | 179.0(3) |
| N(1)-Cu(1)-O(40)    | 173.4(3) | O(40)-Cu(1)-O(41)   | 84.5(3)  |
| N(1)-Cu(1)-O(41)    | 97.6(3)  | N(1)-Cu(1)-O(8)     | 92.4(3)  |
| O(40)-Cu(1)-O(8)    | 94.0(3)  | O(41)-Cu(1)-O(8)    | 88.3(3)  |
| O(30)-La(1)-O(30)#1 | 83.0(3)  | O(30)-La(1)-O(15)   | 70.1(2)  |
| O(30)-La(1)-O(5)    | 113.5(2) | O(15)-La(1)-O(15)#1 | 136.0(3) |
| O(24)-La(1)-O(5)    | 73.1(2)  | O(30)-La(1)-O(24)   | 73.0(2)  |
| O(24)#1-La(1)-O(24) | 136.7(3) | O(15)-La(1)-O(5)    | 73.3(2)  |

<sup>a</sup> Symmetry transformations used to generate equivalent atoms: #1 1-x, y, 0.5-z.

**Table S2.** Selected bond lengths (Å) and angles (°) in compound **2<sup>a</sup>**.

|                     |           |                   |          |
|---------------------|-----------|-------------------|----------|
| P(1)-O(19)          | 1.509(8)  | P(1)-O(33)        | 1.518(8) |
| P(1)-O(23)          | 1.520(9)  | P(1)-O(30)        | 1.546(9) |
| W(1)-O(6)           | 1.702(9)  | W(1)-O(23)        | 2.452(7) |
| W(2)-O(13)          | 1.697(9)  | W(2)-O(19)        | 2.361(8) |
| W(3)-O(11)          | 1.701(9)  | W(3)-O(23)        | 2.411(8) |
| W(4)-O(4)           | 1.699(9)  | W(4)-O(30)        | 2.443(8) |
| W(5)-O(8)           | 1.704(8)  | W(5)-O(23)        | 2.506(7) |
| W(6)-O(1)           | 1.704(9)  | W(6)-O(19)        | 2.359(8) |
| W(7)-O(29)          | 1.709(9)  | W(7)-O(33)        | 2.447(9) |
| W(8)-O(25)          | 1.693(9)  | W(8)-O(30)        | 2.490(7) |
| W(9)-O(35)          | 1.712(8)  | W(9)-O(33)        | 2.407(7) |
| W(10)-O(2)          | 1.700(11) | W(10)-O(30)       | 2.419(9) |
| W(11)-O(17)         | 1.715(10) | W(11)-O(33)       | 2.455(9) |
| Pr(1)-O(41)         | 2.430(9)  | Pr(1)-O(20)       | 2.473(8) |
| Pr(1)-O(18)         | 2.477(9)  | Pr(1)-O(22)       | 2.438(8) |
| Cu(1)-N(2)          | 1.946(10) | Cu(1)-N(1)        | 1.961(9) |
| Cu(1)-O(40)         | 1.965(8)  | Cu(1)-O(39)       | 1.979(8) |
| Cu(1)-O(8)          | 2.379(8)  | Cu(1)-O(11)       | 2.564(8) |
| O(19)-P(1)-O(33)    | 111.9(5)  | O(19)-P(1)-O(23)  | 110.6(5) |
| O(33)-P(1)-O(23)    | 107.2(5)  | O(19)-P(1)-O(30)  | 110.5(4) |
| O(33)-P(1)-O(30)    | 109.0(5)  | O(23)-P(1)-O(30)  | 107.4(5) |
| O(6)-W(1)-O(22)     | 103.6(4)  | O(22)-W(1)-O(5)   | 93.1(4)  |
| O(7)-W(1)-O(23)     | 70.6(3)   | O(6)-W(1)-O(23)   | 165.7(3) |
| O(13)-W(2)-O(20)    | 101.8(4)  | O(15)-W(2)-O(19)  | 72.8(3)  |
| O(13)-W(2)-O(19)    | 171.0(4)  | O(20)-W(2)-O(28)  | 163.5(4) |
| O(11)-W(3)-O(12)    | 101.5(4)  | O(9)-W(3)-O(23)   | 73.4(3)  |
| O(21)-W(3)-O(9)     | 89.0(3)   | O(21)-W(3)-O(10)  | 156.9(4) |
| O(4)-W(4)-O(41)     | 105.5(4)  | O(32)-W(4)-O(30)  | 69.5(3)  |
| O(4)-W(4)-O(32)     | 96.0(4)   | O(4)-W(4)-O(30)   | 163.5(4) |
| O(8)-W(5)-O(7)      | 103.0(4)  | O(7)-W(5)-O(23)   | 72.4(3)  |
| O(7)-W(5)-O(24)     | 89.7(4)   | O(8)-W(5)-O(23)   | 172.1(4) |
| O(18)-W(6)-O(27)    | 92.9(4)   | O(15)-W(6)-O(19)  | 72.4(3)  |
| O(1)-W(6)-O(16)     | 95.6(4)   | O(1)-W(6)-O(19)   | 172.0(4) |
| N(2)-Cu(1)-N(1)     | 82.5(4)   | N(2)-Cu(1)-O(40)  | 174.1(4) |
| N(1)-Cu(1)-O(40)    | 95.9(4)   | N(2)-Cu(1)-O(39)  | 97.5(4)  |
| N(1)-Cu(1)-O(39)    | 179.2(4)  | O(40)-Cu(1)-O(39) | 84.0(3)  |
| N(2)-Cu(1)-O(8)     | 92.4(4)   | N(1)-Cu(1)-O(8)   | 92.3(4)  |
| O(40)-Cu(1)-O(8)    | 93.3(3)   | O(39)-Cu(1)-O(8)  | 88.5(3)  |
| O(41)#1-Pr(1)-O(41) | 82.3(4)   | O(41)-Pr(1)-O(22) | 70.7(3)  |
| O(20)-Pr(1)-O(20)#1 | 81.1(3)   | O(20)-Pr(1)-O(18) | 74.1(3)  |



O(18)-Pr(1)-O(18)#1 137.0(4) O(22)-Pr(1)-O(18) 114.2(3)

<sup>a</sup> Symmetry transformations used to generate equivalent atoms: #1 2-x, y, 0.5-z.

**Table S3.** Selected bond lengths (Å) and angles (°) in compound **3<sup>a</sup>**.

|                     |           |                    |           |
|---------------------|-----------|--------------------|-----------|
| P(1)-O(38)          | 1.516(8)  | P(1)-O(32)         | 1.537(8)  |
| P(1)-O(13)          | 1.526(7)  | P(1)-O(36)         | 1.544(8)  |
| W(1)-O(28)          | 1.694(8)  | W(1)-O(13)         | 2.346(8)  |
| W(2)-O(1)           | 1.707(9)  | W(2)-O(32)         | 2.410(8)  |
| W(3)-O(6)           | 1.706(10) | W(3)-O(32)         | 2.450(8)  |
| W(4)-O(34)          | 1.691(7)  | W(4)-O(38)         | 2.431(7)  |
| W(5)-O(17)          | 1.699(8)  | W(5)-O(38)         | 2.458(8)  |
| W(6)-O(23)          | 1.728(8)  | W(6)-O(36)         | 2.468(8)  |
| W(7)-O(7)           | 1.700(8)  | W(7)-O(36)         | 2.486(7)  |
| W(8)-O(19)          | 1.735(7)  | W(8)-O(38)         | 2.489(7)  |
| W(9)-O(9)           | 1.708(9)  | W(9)-O(36)         | 2.405(8)  |
| W(10)-O(26)         | 1.724(8)  | W(10)-O(32)        | 2.431(7)  |
| W(11)-O(11)         | 1.705(8)  | W(11)-O(13)        | 2.370(7)  |
| Cu(14)-N(1)         | 1.933(10) | Cu(14)-N(2)        | 1.970(10) |
| Cu(14)-O(40)        | 1.991(8)  | Cu(14)-O(41)       | 1.992(8)  |
| Cu(14)-O(19)        | 2.380(7)  | Cu(14)-O(34)       | 2.561(7)  |
| Eu(1)-O(16)         | 2.390(7)  | Eu(1)-O(15)        | 2.401(8)  |
| Eu(1)-O(29)         | 2.419(7)  | Eu(1)-O(14)        | 2.436(9)  |
| O(38)-P(1)-O(13)    | 110.3(5)  | O(38)-P(1)-O(36)   | 108.7(4)  |
| O(38)-P(1)-O(32)    | 107.7(4)  | O(13)-P(1)-O(36)   | 111.0(4)  |
| O(13)-P(1)-O(32)    | 110.4(4)  | O(32)-P(1)-O(36)   | 108.6(5)  |
| O(24)-W(1)-O(13)    | 73.4(3)   | O(29)-W(1)-O(24)   | 92.9(3)   |
| O(28)-W(1)-O(25)    | 94.8(4)   | O(28)-W(1)-O(13)   | 172.3(4)  |
| O(2)-W(2)-O(32)     | 72.7(3)   | O(1)-W(2)-O(3)     | 104.8(4)  |
| O(4)-W(2)-O(5)      | 88.2(4)   | O(1)-W(2)-O(32)    | 170.8(4)  |
| O(4)-W(3)-O(32)     | 71.6(3)   | O(6)-W(3)-O(10)    | 104.6(4)  |
| O(10)-W(3)-O(27)    | 91.5(4)   | O(6)-W(3)-O(32)    | 169.9(4)  |
| O(30)-W(4)-O(38)    | 72.6(3)   | O(33)-W(4)-O(30)   | 88.8(3)   |
| O(34)-W(4)-O(33)    | 103.5(3)  | O(34)-W(4)-O(38)   | 171.0(3)  |
| O(18)-W(5)-O(38)    | 70.3(3)   | O(17)-W(5)-O(30)   | 99.8(4)   |
| O(39)-W(5)-O(18)    | 84.1(3)   | O(17)-W(5)-O(38)   | 164.7(3)  |
| O(21)-W(6)-O(36)    | 69.8(3)   | O(15)-W(6)-O(35)   | 92.7(4)   |
| O(23)-W(6)-O(35)    | 99.4(4)   | O(23)-W(6)-O(36)   | 163.9(4)  |
| N(1)-Cu(14)-N(2)    | 81.7(5)   | O(40)-Cu(14)-O(41) | 85.5(3)   |
| N(1)-Cu(14)-O(40)   | 177.9(4)  | N(1)-Cu(14)-O(19)  | 94.2(4)   |
| N(2)-Cu(14)-O(40)   | 96.6(4)   | N(2)-Cu(14)-O(19)  | 92.7(3)   |
| N(1)-Cu(14)-O(41)   | 96.1(4)   | O(40)-Cu(14)-O(19) | 87.1(3)   |
| N(2)-Cu(14)-O(41)   | 171.8(4)  | O(41)-Cu(14)-O(19) | 95.4(3)   |
| O(16)-Eu(1)-O(16)#1 | 135.8(3)  | O(16)-Eu(1)-O(15)  | 71.5(3)   |

|                   |          |                     |          |
|-------------------|----------|---------------------|----------|
| O(16)-Eu(1)-O(29) | 73.9(2)  | O(15)-Eu(1)-O(15)#1 | 81.0(4)  |
| O(15)-Eu(1)-O(29) | 115.1(3) | O(14)#1-Eu(1)-O(14) | 136.7(4) |

<sup>a</sup> Symmetry transformations used to generate equivalent atoms: #1 1-x, y, 1.5-z.

**Table S4.** Selected bond lengths (Å) and angles (°) in compound **4<sup>a</sup>**.

|                   |           |                    |           |
|-------------------|-----------|--------------------|-----------|
| P(1)-O(12)        | 1.517(11) | P(1)-O(7)          | 1.553(10) |
| P(1)-O(11)        | 1.533(10) | P(1)-O(22)         | 1.562(11) |
| W(1)-O(32)        | 1.720(12) | W(1)-O(12)         | 2.466(10) |
| W(2)-O(28)        | 1.710(11) | W(2)-O(11)         | 2.347(10) |
| W(3)-O(29)        | 1.734(10) | W(3)-O(22)         | 2.477(10) |
| W(4)-O(25)        | 1.740(10) | W(4)-O(12)         | 2.478(9)  |
| W(5)-O(26)        | 1.708(11) | W(5)-K(1)          | 3.939(5)  |
| W(6)-O(30)        | 1.723(11) | W(6)-O(7)          | 2.433(10) |
| W(7)-O(34)        | 1.692(12) | W(7)-O(11)         | 2.350(10) |
| W(8)-O(15)        | 1.695(11) | W(8)-O(22)         | 2.494(9)  |
| W(9)-O(33)        | 1.720(14) | W(9)-O(22)         | 2.370(11) |
| W(10)-O(35)       | 1.712(10) | W(10)-O(7)         | 2.396(9)  |
| W(11)-O(36)       | 1.682(15) | W(11)-O(7)         | 2.436(11) |
| Cu(14)-N(2)       | 1.942(13) | Cu(14)-O(41)       | 2.000(10) |
| Cu(14)-N(1)       | 1.963(12) | Cu(14)-O(25)       | 2.353(10) |
| Cu(14)-O(40)      | 1.984(10) | Cu(14)-O(26)       | 2.579(10) |
| Gd(1)-O(17)       | 2.378(9)  | Gd(1)-O(16)        | 2.413(9)  |
| Gd(1)-O(20)       | 2.381(9)  | Gd(1)-O(27)        | 2.431(10) |
| O(12)-P(1)-O(11)  | 111.3(6)  | O(12)-P(1)-O(22)   | 108.6(6)  |
| O(12)-P(1)-O(7)   | 108.4(6)  | O(11)-P(1)-O(22)   | 110.5(6)  |
| O(11)-P(1)-O(7)   | 110.3(6)  | O(7)-P(1)-O(22)    | 107.7(6)  |
| O(2)-W(1)-O(12)   | 69.7(4)   | O(32)-W(1)-O(20)   | 103.1(5)  |
| O(20)-W(1)-O(14)  | 94.3(5)   | O(32)-W(1)-O(12)   | 165.5(5)  |
| O(1)-W(2)-O(11)   | 80.0(4)   | O(28)-W(2)-O(1)    | 95.1(4)   |
| O(28)-W(2)-O(4)   | 102.6(5)  | O(28)-W(2)-O(11)   | 170.3(5)  |
| O(21)-W(3)-O(22)  | 70.4(4)   | O(29)-W(3)-O(21)   | 95.7(5)   |
| O(29)-W(3)-O(14)  | 101.6(5)  | O(29)-W(3)-O(22)   | 163.9(5)  |
| O(2)-W(4)-O(12)   | 73.1(4)   | O(2)-W(4)-O(10)    | 87.5(5)   |
| O(25)-W(4)-O(2)   | 102.4(5)  | O(25)-W(4)-O(12)   | 172.1(5)  |
| O(5)-W(5)-O(12)   | 73.3(4)   | O(26)-W(5)-O(10)   | 100.2(5)  |
| O(4)-W(5)-O(5)    | 87.6(4)   | O(26)-W(5)-O(12)   | 170.4(5)  |
| O(39)-W(6)-O(7)   | 71.3(4)   | O(1)-W(6)-O(23)    | 90.8(5)   |
| O(30)-W(6)-O(39)  | 101.1(5)  | O(30)-W(6)-O(7)    | 170.7(5)  |
| N(2)-Cu(14)-N(1)  | 81.4(6)   | O(40)-Cu(14)-O(41) | 85.4(4)   |
| N(2)-Cu(14)-O(40) | 96.1(5)   | N(2)-Cu(14)-O(25)  | 93.8(5)   |
| N(1)-Cu(14)-O(40) | 172.4(5)  | N(1)-Cu(14)-O(25)  | 92.5(5)   |
| N(2)-Cu(14)-O(41) | 178.3(5)  | O(40)-Cu(14)-O(25) | 94.8(4)   |
| N(1)-Cu(14)-O(41) | 97.0(5)   | O(41)-Cu(14)-O(25) | 87.0(5)   |

|                   |          |                     |          |
|-------------------|----------|---------------------|----------|
| O(17)-Gd(1)-O(20) | 71.8(3)  | O(20)-Gd(1)-O(20)#1 | 134.8(5) |
| O(17)-Gd(1)-O(16) | 115.2(3) | O(17)-Gd(1)-O(27)   | 73.7(4)  |
| O(16)-Gd(1)-O(27) | 73.4(4)  | O(27)#1-Gd(1)-O(27) | 137.2(5) |

<sup>a</sup> Symmetry transformations used to generate equivalent atoms: #1 1-x, y, 1.5-z.

**Table S5.** Selected bond lengths (Å) and angles (°) in compound **5<sup>a</sup>**.

|                    |          |                    |          |
|--------------------|----------|--------------------|----------|
| P(1)-O(40)         | 1.516(7) | P(1)-O(39)         | 1.538(7) |
| P(1)-O(22)         | 1.518(7) | P(1)-O(33)         | 1.547(7) |
| W(1)-O(18)         | 1.688(7) | W(1)-O(40)         | 2.441(7) |
| W(2)-O(27)         | 1.720(7) | W(2)-O(22)         | 2.344(6) |
| W(3)-O(10)         | 1.707(6) | W(3)-O(40)         | 2.478(6) |
| W(4)-O(31)         | 1.698(7) | W(4)-O(33)         | 2.433(6) |
| W(5)-O(3)          | 1.733(7) | W(5)-O(22)         | 2.348(6) |
| W(6)-O(36)         | 1.714(7) | W(6)-O(39)         | 2.441(7) |
| W(7)-O(30)         | 1.698(7) | W(7)-O(33)         | 2.485(7) |
| W(8)-O(17)         | 1.702(7) | W(8)-O(40)         | 2.445(6) |
| W(9)-O(4)          | 1.701(7) | W(9)-O(33)         | 2.430(7) |
| W(10)-O(5)         | 1.710(8) | W(10)-O(39)        | 2.444(7) |
| W(11)-O(7)         | 1.698(7) | W(11)-O(39)        | 2.393(7) |
| Cu(14)-N(1)        | 1.940(9) | Cu(14)-N(2)        | 1.989(9) |
| Cu(14)-O(11)       | 1.966(7) | Cu(14)-O(10)       | 2.392(7) |
| Cu(14)-O(12)       | 1.988(8) | Cu(14)-O(17)       | 2.596(7) |
| Yb(8)-O(21)        | 2.326(7) | Yb(8)-O(1)         | 2.331(7) |
| Yb(8)-O(19)        | 2.338(6) | Yb(8)-O(2)         | 2.350(7) |
| O(40)-P(1)-O(22)   | 111.0(4) | O(40)-P(1)-O(33)   | 107.3(4) |
| O(40)-P(1)-O(39)   | 108.8(4) | O(22)-P(1)-O(33)   | 110.2(4) |
| O(22)-P(1)-O(39)   | 110.3(4) | O(39)-P(1)-O(33)   | 109.2(4) |
| O(13)-W(1)-O(40)   | 70.8(3)  | O(38)-W(1)-O(13)   | 81.0(3)  |
| O(18)-W(1)-O(19)   | 104.7(3) | O(18)-W(1)-O(40)   | 165.3(3) |
| O(26)-W(2)-O(22)   | 73.3(3)  | O(27)-W(2)-O(23)   | 95.9(3)  |
| O(27)-W(2)-O(22)   | 172.1(3) | O(1)-W(2)-O(23)    | 161.2(3) |
| O(13)-W(3)-O(40)   | 72.5(3)  | O(13)-W(3)-O(29)   | 90.5(3)  |
| O(10)-W(3)-O(9)    | 102.7(3) | O(10)-W(3)-O(40)   | 172.8(3) |
| O(15)-W(4)-O(33)   | 69.2(3)  | O(34)-W(4)-O(15)   | 82.5(3)  |
| O(31)-W(4)-O(32)   | 99.1(3)  | O(31)-W(4)-O(33)   | 164.4(3) |
| O(26)-W(5)-O(22)   | 72.7(2)  | O(3)-W(5)-O(24)    | 101.2(3) |
| O(2)-W(5)-O(26)    | 95.2(3)  | O(3)-W(5)-O(22)    | 171.6(3) |
| O(8)-W(6)-O(39)    | 70.9(3)  | O(23)-W(6)-O(37)   | 90.9(3)  |
| O(36)-W(6)-O(39)   | 170.7(3) | O(16)-W(6)-O(37)   | 156.8(3) |
| N(1)-Cu(14)-O(11)  | 96.1(4)  | O(12)-Cu(14)-N(2)  | 96.4(4)  |
| N(1)-Cu(14)-O(12)  | 178.9(3) | N(1)-Cu(14)-O(10)  | 93.6(3)  |
| O(11)-Cu(14)-O(12) | 84.5(3)  | O(11)-Cu(14)-O(10) | 94.3(3)  |
| N(1)-Cu(14)-N(2)   | 82.8(4)  | O(12)-Cu(14)-O(10) | 87.2(3)  |

|                     |          |                     |          |
|---------------------|----------|---------------------|----------|
| O(11)-Cu(14)-N(2)   | 173.0(3) | N(2)-Cu(14)-O(10)   | 92.7(3)  |
| O(21)-Yb(8)-O(21)#1 | 80.4(4)  | O(21)-Yb(8)-O(1)    | 115.5(2) |
| O(1)#1-Yb(8)-O(1)   | 80.2(3)  | O(21)-Yb(8)-O(19)   | 71.7(2)  |
| O(1)-Yb(8)-O(19)    | 74.0(2)  | O(19)-Yb(8)-O(19)#1 | 135.7(3) |

<sup>a</sup> Symmetry transformations used to generate equivalent atoms: #1 1-x, y, 0.5-z.

**Table S6.** Selected bond lengths (Å) and angles (°) in compound **6<sup>a</sup>**.

|                  |           |                  |           |
|------------------|-----------|------------------|-----------|
| P(1)-O(5)        | 1.462(13) | P(1)-O(12)       | 1.575(12) |
| P(1)-O(3)        | 1.495(12) | P(1)-O(22)       | 1.583(12) |
| W(1)-O(15)       | 1.701(13) | W(1)-O(5)        | 2.475(11) |
| W(2)-O(26)       | 1.729(12) | W(2)-O(22)       | 2.458(10) |
| W(3)-O(27)       | 1.692(13) | W(3)-O(32)       | 1.950(13) |
| W(4)-O(33)       | 1.704(13) | W(4)-O(3)        | 2.378(13) |
| W(5)-O(21)       | 1.715(13) | W(5)-O(22)       | 2.498(11) |
| W(6)-O(11)       | 1.712(13) | W(6)-O(3)        | 2.346(12) |
| W(7)-O(35)       | 1.728(14) | W(7)-O(22)       | 2.377(11) |
| W(8)-O(34)       | 1.722(13) | W(8)-O(12)       | 2.375(11) |
| W(9)-O(14)       | 1.715(14) | W(9)-O(12)       | 2.423(13) |
| W(10)-O(7)       | 1.714(14) | W(10)-O(5)       | 2.420(12) |
| W(11)-O(41)      | 1.694(16) | W(11)-O(12)      | 2.441(13) |
| K(1)-O(20)       | 2.405(13) | K(1)-O(31)       | 2.420(12) |
| K(1)-O(16)       | 2.458(12) | K(1)-O(18)       | 2.480(12) |
| Cu(1)-N(1)       | 1.90(2)   | Cu(1)-O(2)       | 2.009(14) |
| Cu(1)-N(2)       | 1.940(17) | Cu(1)-O(27)      | 2.393(13) |
| Cu(1)-O(1)       | 1.971(12) | Cu(1)-O(7)       | 2.560(13) |
| O(5)-P(1)-O(3)   | 111.3(7)  | O(5)-P(1)-O(22)  | 109.9(7)  |
| O(5)-P(1)-O(12)  | 108.2(7)  | O(3)-P(1)-O(22)  | 108.9(7)  |
| O(3)-P(1)-O(12)  | 111.1(7)  | O(12)-P(1)-O(22) | 107.3(7)  |
| O(29)-W(1)-O(5)  | 72.2(5)   | O(9)-W(1)-O(29)  | 83.3(5)   |
| O(15)-W(1)-O(19) | 99.2(7)   | O(15)-W(1)-O(5)  | 166.0(5)  |
| O(10)-W(2)-O(22) | 69.5(4)   | O(26)-W(2)-O(10) | 95.0(6)   |
| O(9)-W(2)-O(10)  | 82.8(5)   | O(26)-W(2)-O(22) | 163.0(5)  |
| O(8)-W(3)-O(6)   | 87.3(6)   | O(29)-W(3)-O(6)  | 87.9(5)   |
| O(27)-W(3)-O(29) | 103.4(6)  | O(6)-W(3)-O(32)  | 157.6(5)  |
| O(17)-W(4)-O(3)  | 72.6(5)   | O(18)-W(4)-O(13) | 95.9(5)   |
| O(13)-W(4)-O(3)  | 85.9(5)   | O(18)-W(4)-O(4)  | 164.2(5)  |
| O(36)-W(5)-O(22) | 71.3(5)   | O(32)-W(5)-O(24) | 85.6(5)   |
| O(32)-W(5)-O(22) | 86.4(5)   | O(21)-W(5)-O(22) | 170.3(5)  |
| O(17)-W(6)-O(3)  | 73.2(5)   | O(11)-W(6)-O(37) | 93.3(6)   |
| O(11)-W(6)-O(17) | 99.0(6)   | O(11)-W(6)-O(3)  | 170.2(6)  |
| N(1)-Cu(1)-N(2)  | 81.8(8)   | O(1)-Cu(1)-O(2)  | 83.9(5)   |
| N(1)-Cu(1)-O(1)  | 98.6(7)   | N(1)-Cu(1)-O(27) | 91.6(6)   |
| N(2)-Cu(1)-O(1)  | 179.3(7)  | N(2)-Cu(1)-O(27) | 90.4(6)   |

---

|                    |          |                  |          |
|--------------------|----------|------------------|----------|
| N(1)-Cu(1)-O(2)    | 175.3(6) | O(1)-Cu(1)-O(27) | 89.1(5)  |
| N(2)-Cu(1)-O(2)    | 95.8(6)  | O(2)-Cu(1)-O(27) | 92.5(5)  |
| O(20)-K(1)-O(20)#1 | 80.3(6)  | O(20)-K(1)-O(31) | 74.4(4)  |
| O(31)#1-K(1)-O(31) | 136.9(7) | O(31)-K(1)-O(16) | 113.6(4) |
| O(20)-K(1)-O(16)   | 69.7(4)  | O(20)-K(1)-O(18) | 114.6(4) |

<sup>a</sup> Symmetry transformations used to generate equivalent atoms: #1 -x, y, 1.5-z.
